# Supplementary material for: Classification-based comparison of pre-processing methods for interpretation of mass spectrometry generated clinical datasets
Source: PubMed Central journal article supplement (PMC2689848; doi:10.1186/1477-5956-7-19), 2009-05-14
Supplement: 1477-5956-7-19-S1.pdf [file 1477-5956-7-19-S1.pdf]

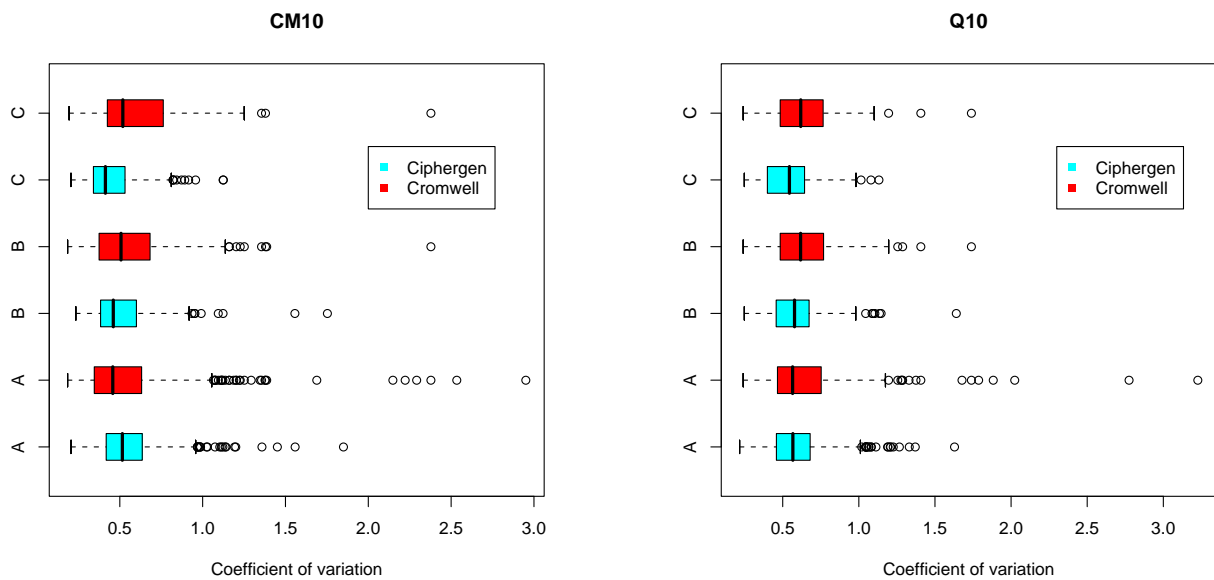

**Variance analysis (ovarian cancer dataset).** Boxplots of the coefficient of variation (CV, standard deviation/mean peak intensity). Left panel: CV for all combinations of pre-processing method (CIPHERGEN: cyan, CROMWELL: red) and peak selection setting (A, B, C) for the CM10 chip. Right panel: idem for Q10 chip.
