# Supplementary material for: Classification-based comparison of pre-processing methods for interpretation of mass spectrometry generated clinical datasets
Source: PubMed Central journal article supplement (PMC2689848; doi:10.1186/1477-5956-7-19), 2009-05-14
Supplement: 1477-5956-7-19-S4.pdf [file 1477-5956-7-19-S4.pdf]

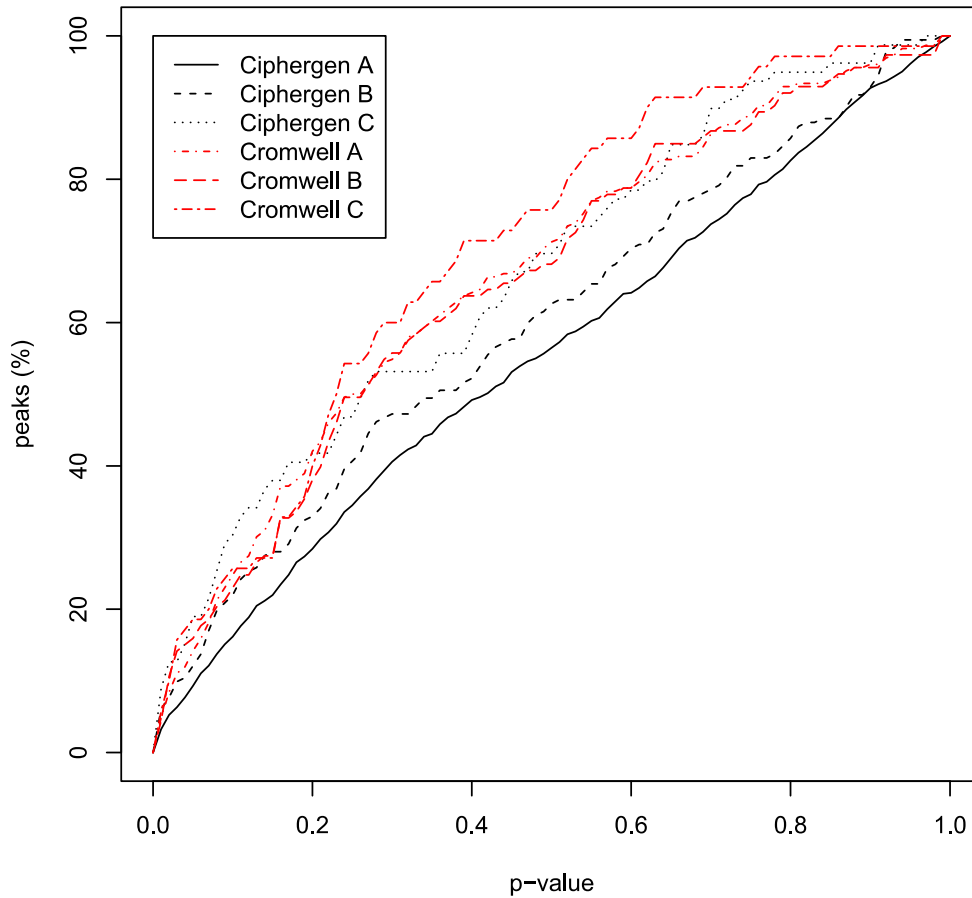

**Cumulative plot of significance of detected peaks (ovarian cancer dataset, Q10).** For each combination of pre-processing method and peak selection settings, the cumulative percentage of peaks with a p-value smaller than the value on the x-axis is shown. P-value of a peak is based on a t-test between the normalized intensities of the cancer and the control group.
